# Supplementary material
Source: PubMed Central journal article supplement (PMC7926590)
Supplement: SMJ-61-412.pdf [file SMJ-61-412.pdf]

## SINGAPORE MEDICAL COUNCIL CATEGORY 3B CME PROGRAMME

(Code SMJ 202008B)

**Question 1.** The following statements regarding symptoms of coronavirus disease 2019 (COVID-19) are true:

- (a) Cough in COVID-19 is always productive.
- (b) Shortness of breath is a common presenting symptom.
- (c) Rhinorrhoea is not seen in these patients.
- (d) Patients may present with palpitations.

True      False

- |                          |                          |
|--------------------------|--------------------------|
| <input type="checkbox"/> | <input type="checkbox"/> |

**Question 2.** The following statements regarding the presentation of COVID-19 are true:

- (a) In COVID-19 pneumonia, patients always present with low oxygen saturation ( $SpO_2 < 95\%$ ).
- (b) The most common electrocardiographic abnormality in patients with COVID-19 is sinus bradycardia.
- (c) The initial chest radiograph may be normal.
- (d) Patients may be afebrile at presentation.

- |                          |                          |
|--------------------------|--------------------------|
| <input type="checkbox"/> | <input type="checkbox"/> |

**Question 3.** Cardiovascular manifestations of COVID-19 may include:

- (a) Acute myocardial infarction.
- (b) Myocarditis.
- (c) Cardiac arrhythmias.
- (d) Aortic dissection.

- |                          |                          |
|--------------------------|--------------------------|
| <input type="checkbox"/> | <input type="checkbox"/> |

**Question 4.** Possible electrocardiographic manifestations of COVID-19 may include:

- (a) Sinus tachycardia.
- (b) Atrial fibrillation/flutter.
- (c) Sinus bradycardia.
- (d) Prolonged QT interval.

- |                          |                          |
|--------------------------|--------------------------|
| <input type="checkbox"/> | <input type="checkbox"/> |

**Question 5.** Medications used in the therapy of COVID-19 that may cause prolonged QT interval include:

- (a) Hydroxychloroquine.
- (b) Azithromycin.
- (c) Lopinavir/ritonavir.
- (d) Remdesivir.

- |                          |                          |
|--------------------------|--------------------------|
| <input type="checkbox"/> | <input type="checkbox"/> |

### Doctor's particulars:

Name in full: \_\_\_\_\_ MCR no.: \_\_\_\_\_  
 Specialty: \_\_\_\_\_ Email: \_\_\_\_\_

#### SUBMISSION INSTRUCTIONS:

Visit the SMJ website: <http://www.smj.org.sg/current-issue> and select the appropriate quiz. You will be redirected to the SMA login page.

**For SMA member:** (1) Log in with your username and password (if you do not know your password, please click on 'Forgot your password?'). (2) Select your answers for each quiz and click 'Submit'.

**For non-SMA member:** (1) Create an SMJ CME account, or log in with your SMJ CME username and password (for returning users). (2) Make payment of SGD 21.40 (inclusive of 7% GST) via PayPal to access this month's quizzes. (3) Select your answers for each quiz and click 'Submit'.

#### RESULTS:

(1) Answers will be published online in the SMJ October 2020 issue. (2) The MCR numbers of successful candidates will be posted online at the SMJ website by 9 October 2020. (3) Passing mark is 60%. No mark will be deducted for incorrect answers. (4) The SMJ editorial office will submit the list of successful candidates to the Singapore Medical Council. (5) One CME point is awarded for successful candidates. (6) SMC credits CME points according to the month of publication of the CME article (i.e. points awarded for a quiz published in the August 2020 issue will be credited for the month of August 2020, even if the deadline is in October 2020).

**Deadline for submission (August 2020 SMJ 3B CME programme): 12 noon, 2 October 2020.**
